# Supplementary material for: Withdrawal of intravenous immunoglobulin in chronic inflammatory demyelinating polyradiculoneuropathy
Source: PubMed Central journal article supplement — Brain. 2022 Feb 9;145(5):1641–52. doi: 10.1093/brain/awac054 (PMC9166547; doi:10.1093/brain/awac054), 2022-02-09
Supplement: awac054_supplementary_data.pdf [file awac054_supplementary_data.pdf]

## Table of contents

| <b>Item</b> | <b>Content</b>        |                                                                                         | <b>Page</b> |
|-------------|-----------------------|-----------------------------------------------------------------------------------------|-------------|
| <b>1</b>    | Supplementary Table 1 | Outcome measures                                                                        | 2           |
| <b>2</b>    | Supplementary Table 2 | Protocol violations                                                                     | 3           |
| <b>3</b>    | Supplementary Table 3 | Different outcome measures in patients with a relapse endpoint at different time points | 4           |
| <b>4</b>    | Appendix 1            | Linear regression in the context of a non-inferiority design                            | 5           |
| <b>5</b>    | References            |                                                                                         | 6           |

**Supplementary Table 1. Outcome Measures**

| Outcome                                                     | Measure                                             | Description                                                                                                                                                                                                                                                                                         | Range                                                              |
|-------------------------------------------------------------|-----------------------------------------------------|-----------------------------------------------------------------------------------------------------------------------------------------------------------------------------------------------------------------------------------------------------------------------------------------------------|--------------------------------------------------------------------|
| <b>Primary outcome</b>                                      |                                                     |                                                                                                                                                                                                                                                                                                     |                                                                    |
| <b>Disability</b>                                           | Inflammatory Rasch-Overall Disability Scale (iRODS) | <ul style="list-style-type: none"> <li>• Patient reported linear disability scale, developed within the frame work of Item Response Theory<sup>1</sup></li> <li>• Unit of measurement expressed in logits</li> <li>• Higher scores represent lower levels of disability</li> </ul>                  | Logits: -6.95 - 8.11                                               |
| <b>Secondary outcomes</b>                                   |                                                     |                                                                                                                                                                                                                                                                                                     |                                                                    |
| <b>Muscle Strength</b>                                      | Medical research council (MRC) sum score            | <ul style="list-style-type: none"> <li>• 6 pairs of muscles</li> <li>• Shoulder abduction, elbow flexion, wrist extension, hip flexion, knee extension and foot dorsiflexion</li> <li>• Higher scores represent more muscle strength</li> </ul>                                                     | 0-60                                                               |
| <b>Grip Strength</b>                                        | Martin Vigori meter                                 | <ul style="list-style-type: none"> <li>• Measured in kilo Pascal (kPa)</li> <li>• Higher score represents greater grip strength</li> <li>• Highest value out of 3 measurements per hand</li> <li>• Dominant hand in typical CIDP and most affected hand in multifocal or asymmetric CIDP</li> </ul> | 0-160                                                              |
| <b>Sensory impairment</b>                                   | Modified INCAT sensory Sum score (INCAT-SS)         | <ul style="list-style-type: none"> <li>• Sensory scale including vibration and pinprick sense plus a two-point discrimination value</li> <li>• Higher score represents more sensory impairment</li> </ul>                                                                                           | 0-20                                                               |
| <b>Pain</b>                                                 | Pain Intensity Numerical Rating Scale (PI-NRS)      | <ul style="list-style-type: none"> <li>• Average pain over the past 4 weeks</li> <li>• Higher score represents more pain</li> </ul>                                                                                                                                                                 | 0-10                                                               |
| <b>Fatigue</b>                                              | Rasch-built fatigue severity scale (FSS)            | <ul style="list-style-type: none"> <li>• 7 item scale</li> <li>• Higher score represents greater fatigue</li> </ul>                                                                                                                                                                                 | 0-49                                                               |
| <b>Disability</b>                                           | AMC linear disability score (ALDS)                  | <ul style="list-style-type: none"> <li>• A calibrated generic item bank to measure the level of physical disability in patients with chronic diseases.</li> <li>• Higher scores represent lower levels of disability</li> </ul>                                                                     | 0-100                                                              |
| <b>Quality of life</b>                                      | Short form 36 (SF-36)                               | <ul style="list-style-type: none"> <li>• Divided into physical and mental health components</li> <li>• Higher scores represent better quality of life</li> </ul>                                                                                                                                    | Normalized to the Dutch population mean score of 50 and a SD of 10 |
| <b>Patient's perception of deterioration or improvement</b> | Patient global impression of change scale           | <ul style="list-style-type: none"> <li>• 5 point Likert-scale on which patients indicate if their CIDP complaints are much better, better, similar, worse or much worse than before start of the study</li> </ul>                                                                                   | NA                                                                 |

Supplementary **Table 2. Protocol violations**

| <b>Patient</b> | <b>Protocol violation</b>                                                                                                                                                                                                                      | <b>Study action</b>                                                              |
|----------------|------------------------------------------------------------------------------------------------------------------------------------------------------------------------------------------------------------------------------------------------|----------------------------------------------------------------------------------|
| 1              | Patient in the withdrawal group refused to stay blinded at 12 weeks due to anxiety of not knowing what the treatment allocation was. This patient agreed to proceed with follow-up assessments and remained stable until last follow-up visit. | - Included in intention-to-treat analysis<br>- Excluded in per-protocol analysis |
| 2              | Patient in the IVIg continuation group was unblinded at 3 weeks of follow-up due to an invoice from the insurance company for IVIg treatment; this patient remained stable until last follow-up visit.                                         | - Included in intention-to-treat analysis<br>- Excluded in per-protocol analysis |
| 3              | Patient was wrongly allocated during the minimization procedure in terms of duration of treatment. The duration was corrected in the data-analysis.                                                                                            | - Included in intention-to-treat analysis<br>- Included in per-protocol analysis |
| 4              | Study treatment was delayed because of one extra regular infusion after randomization.                                                                                                                                                         | - Included in intention-to-treat analysis<br>- Included in per-protocol analysis |

Supplementary table 3. Different outcome measures in patients with a relapse endpoint at different time points

| N (%)                                  |                    | Week 6    |            | Week 12   |             | Week 18   |             | Week 24   |             |
|----------------------------------------|--------------------|-----------|------------|-----------|-------------|-----------|-------------|-----------|-------------|
|                                        |                    | Freq.     | Cum. Freq. | Freq.     | Cum. Freq.  | Freq.     | Cum. Freq.  | Freq.     | Cum. Freq.  |
| <b>All relapse endpoints (N=30)</b>    |                    |           |            |           |             |           |             |           |             |
| <b>IVIg withdrawal (N=17)</b>          | Total              | 7 (42)    | 7 (42)     | 6 (20)    | 13 (65)     | 2 (12)    | 15 (88)     | 2 (12)    | 17 (100)    |
|                                        | iRODS <sup>a</sup> | 5/7 (71)  | 5/7 (71)   | 2/6 (33)  | 7/13(54)    | 1/2 (50)  | 8/15 (53)   | 2/2 (100) | 10/17 (59)  |
|                                        | GS <sup>b</sup>    | 5/7 (71)  | 5/7 (71)   | 3/6 (50)  | 8/13(62)    | 2/2 (100) | 10/15 (67)  | 2/2 (100) | 12/17 (71)  |
|                                        | MRC <sup>c</sup>   | 4/7 (57)  | 4/7 (57)   | 1/6 (17)  | 5/13 (38)   | 1/2 (50)  | 6/15 (37)   | 1/2 (50)  | 7/17 (41)   |
|                                        | PGIC <sup>d</sup>  | 7/7 (100) | 7/7 (100)  | 5/5 (100) | 12/12 (100) | 2/2 (100) | 14/14 (100) | 2/2 (100) | 16/16 (100) |
| <b>IVIg continuation (N=13)</b>        | Total              | 2 (15)    | 2 (15)     | 8 (62)    | 10 (77)     | 3 (23)    | 13 (100)    | 0         | 13 (100)    |
|                                        | iRODS              | 1/2 (50)  | 1/2 (50)   | 4/8 (50)  | 5/10 (50)   | 0/3       | 5/13 (38)   |           | 5/13 (38)   |
|                                        | GS                 | 2/2 (100) | 2/2 (100)  | 2/8 (25)  | 4/10 (40)   | 2/3 (67)  | 6/13 (46)   |           | 6/13 (46)   |
|                                        | MRC                | 1/2 (50)  | 1/2 (50)   | 4/8 (50)  | 5/10 (50)   | 1/3 (33)  | 6/13 (46)   |           | 6/13 (46)   |
|                                        | PGIC               | 1/2 (50)  | 1/2 (50)   | 6/6 (100) | 7/8 (88)    | 3/3 (100) | 10/11 (91)  |           | 10/11 (91)  |
| <b>Relapse according to MCID iRODS</b> |                    |           |            |           |             |           |             |           |             |
| <b>IVIg withdrawal (N= 10)</b>         | Total              | 5 (50)    | 5 (50)     | 2 (20)    | 7 (70)      | 1 (10)    | 8 (80)      | 2 (20)    | 10 (100)    |
|                                        | GS                 | 5/5 (100) | 5/5 (100)  | 1/2 (50)  | 6/7 (86)    | 1/1 (100) | 7/8 (88)    | 2/2 (100) | 9/10 (90)   |
|                                        | MRC                | 4/5 (80)  | 4/5 (80)   | 1/2 (50)  | 5/7 (71)    | 0/1 (0)   | 5/8 (63)    | 1/2 (50)  | 6/10 (60)   |
|                                        | PGIC               | 5/5 (100) | 5/5 (100)  | 1/1 (100) | 6/6 (100)   | 1/1 (100) | 7/7 (100)   | 2/2 (100) | 9/9 (100)   |
| <b>IVIg continuation N=5</b>           | Total              | 1 (20)    | 1 (20)     | 4 (80)    | 5 (100)     | 0 (0)     | 5 (100)     | 0         | 5 (100)     |
|                                        | GS                 | 1/1 (100) | 1/1 (100)  | 2/4 (50)  | 3/5 (60)    |           | 3/5 (60)    |           | 3/5 (60)    |
|                                        | MRC                | 1/1 (100) | 1/1 (100)  | 3/4 (75)  | 4/5 (80)    |           | 4/5 (80)    |           | 4/5 (80)    |
|                                        | PGIC               | 1/1 (100) | 1/1 (100)  | 3/3 (100) | 4/4 (100)   |           | 4/4 (100)   |           | 4/4 (100)   |
| <b>Other relapse</b>                   |                    |           |            |           |             |           |             |           |             |
| <b>IVIg withdrawal (N=7)</b>           | Total              | 2 (29)    | 2 (29)     | 4 (57)    | 6 (86)      | 1 (14)    | 7 (100)     | 0 (0)     | 7 (100)     |
|                                        | GS                 | 2/2 (100) | 2/2 (100)  | 2/4 (50)  | 4/6 (67)    | 1/1 (100) | 5/7 (71)    |           | 5/7 (71)    |
|                                        | MRC                | 0/2 (0)   | 0/2 (0)    | 0/4 (0)   | 0/6 (0)     | 1/1( 100) | 1/7 (14)    |           | 1/7 (14)    |
|                                        | PGIC               | 2/2 (100) | 2/2 (100)  | 4/4 (100) | 6/6 (100)   | 1/1 (100) | 7/7 (100)   |           | 7/7 (100)   |
| <b>IVIg continuation (N=8)</b>         | Total              | 1 (13)    | 1 (13)     | 4 (50)    | 5 (63)      | 3 (38)    | 8 (100)     | 0 (0)     | 8 (100)     |
|                                        | GS                 | 1/1 (100) | 1/1 (100)  | 0/4 (0)   | 1/5 (20)    | 1/3 (33)  | 2/8 (25)    |           | 2/8 (25)    |
|                                        | MRC                | 1/1 (100) | 1/1 (100)  | 1/4 (25)  | 1/5 (20)    | 1/3 (33)  | 2/8 (25)    |           | 2/8 (25)    |
|                                        | PGIC               | 0/1 (0)   | 0/1 (0)    | 3/3 (100) | 3/4 (75)    | 3/3 (33)  | 6/7 (86)    |           | 6/7 (86)    |

<sup>a</sup>Minimal clinically important difference on the iRODS; <sup>b</sup>Relapse on grip strength: deterioration of at least 8kPa; <sup>c</sup>Relapse on MRC: deterioration of at least 2 points on MRC sum score; <sup>d</sup>Relapse on PGIC scale (1-5) was defined as a score of: a little worse or a lot worse than before the study.

Abbreviations: freq: frequency, cum: cumulative, IVIg: intravenous immunoglobulins, GS: grip strength, MRC: MRC sum score, PGIC: patient global impression of change scale.

## Appendix 1. Linear regression in the context of non-inferiority

We used multivariable linear regression on the iRODS follow-up scores in the context of non-inferiority by comparing the lower bound of the 95% confidence interval of the between group-difference with -0.65 as the margin of non-inferiority, adjusting for both the iRODS baseline scores and duration of prior IVIg. The following results were obtained:

Model Coefficients

| Predictor                     | Estimate | SE    | 95% confidence interval |             |
|-------------------------------|----------|-------|-------------------------|-------------|
|                               |          |       | lower bound             | upper bound |
| Intercept                     | -0.319   | 0.459 | -0.1238                 | 0.600       |
| iRODS baseline                | 0.921    | 0.077 | 0.766                   | 1.076       |
| Duration prior IVIg treatment | 0.370    | 0.395 | -0.422                  | 1.163       |
| Withdrawal treatment          | -0.558   | 0.395 | -1.348                  | 0.233       |

After adjustment, the coefficient for withdrawal treatment was -0.558 with a lower bound of -1.348. With the lower bound well below the non-inferiority margin of -0.65, the multivariable approach fails to demonstrate non-inferiority of withdrawal treatment.

## References

1. van Nes SI, Vanhoutte EK, van Doorn PA, et al. Rasch-built Overall Disability Scale (R-ODS) for immune-mediated peripheral neuropathies. *Neurology* 2011; **76**(4): 337-45.
